# Supplementary material for: Genome-Wide Identification and Expression Profiling Analysis of ZmPIN, ZmPILS, ZmLAX and ZmABCB Auxin Transporter Gene Families in Maize (Zea mays L.) under Various Abiotic Stresses
Source: PLoS One. 2015 Mar 5;10(3):e0118751. doi: 10.1371/journal.pone.0118751 (PMC4351008; doi:10.1371/journal.pone.0118751)
Supplement: S2 Table — (XLSX) [file pone.0118751.s004.xlsx]

## Sheet: Sheet1
S2 Table. Spatial-temporal expression patterns of auxin transporter gene families based on digital expression data.
	Germinating Seed 24h. PO:0009001 kernel; PO:imbibition.	Coleoptile 6DAS GH. PO:0025287 seedling coleoptile; PO:0007045 coleoptile emergence.	Coleoptile 6DAS Primary Root. PO:0020127 primary root; PO:0007015 radical emergence.	Stem and SAM (V1). PO:0020142 stem internode; PO:0020148 shoot apical meristem; PO:0007106 LP.03 three leaves visible.	Stem and SAM (V3). PO:0020142 stem internode; PO:0020148 shoot apical meristem; PO:0007065 LP.05 five leaves visible.	Stem and SAM (V4). PO:0020148 shoot apical meristem; PO:0020142 internode; PO:0007123 leaves visible.	Shoot tip (V5). PO:0000037 shoot apex; PO:0009025 vascular PO:0006340 adult leaf; PO:0001052 2 leaf expansion stage; PO:0020040 leaf PO:0020104 leaf sheath; PO:0007063 LP.07 7 leaves visible.	First Internode (V5). PO:0020142 stem internode; PO:0021004 inflorescence initiation stage; PO:0007063 seven leaves visible.	First Internode (V7). PO:0020142 stem internode; PO:0021004 inflorescence initiation stage; PO:0007101 LP.09 nine leaves visible	Fourth Internode (V9). PO:0020142 stem internode; PO:0001083 inflorescence development stages; PO:0007116 LP.11 eleven leaves visible.	Immature Tassel (V13). PO:0020126 tassel; PO:0001007 pollen developmental stages; PO:0007104 LP.15 fifteen leaves visible.	Meiotic Tassel (V18). PO:0020126 tassel; PO:0001009 D pollen mother cell meiosis stage; PO:0007072 LP.18 eighteen leaves visible.	Anthers (R1). PO:0006310 tassel floret; PO:0009066 anther; PO:0001007 pollen developmental stages.	Whole Seedling (VE). PO:0006341 primary shoot; PO:0007094 LP.01 one leaf visible.	Primary Root (VE). PO:0020127 primary root; PO:0007112 1 main shoot growth.	Pooled Leaves (V1). PO:0006339 juvenile leaf; PO:0009025 vascular leaf; PO:0001052 2 leaf expansion stage; PO:0001053 3 leaf fully expanded; PO:0007106 LP.03 three leaves visible.	Primary Root (V1). PO:0020127 primary root; PO:0007106 LP.03 three leaves visible.	Topmost Leaf (V3). PO:0006339 juvenile leaf; PO:0009025 vascular leaf; PO:0001052 2 leaf expansion stage; PO:0007065 LP.05 five leaves visible.	First Leaf (V3). PO:0006339 juvenile leaf; PO:0009025 vascular leaf; PO:0001053 3 leaf fully expanded; PO:0007065 LP.05 five leaves visible.	Tip of Stage 2 leaf (V5). PO:0006339 juvenile leaf; PO:0008018 transition leaf; PO:0009025 vascular leaf; PO:0025142 leaf tip; PO:0001052 2 leaf expansion stage; PO:0007063 LP.07 seven leaves visible.	Base of Stage 2 leaf (V5). PO:0006340 adult leaf; PO:0008018 transition leaf; PO:0009025 vascular leaf; PO:0020040 leaf base; PO:0001052 2 leaf expansion stage; PO:0007063 LP.07 seven leaves visible.	Tip of Stage 2 leaf (V7). PO:0006340 adult leaf; PO:0009025 vascular leaf; PO:0025142 leaf tip; PO:0001052 2 leaf expansion stage; PO:0007101 LP.09 nine leaves visible.	Base of Stage 2 leaf (V7). PO:0006340 adult leaf; PO:0009025 vascular leaf; PO:0020040 leaf base; PO:0001052 2 leaf expansion stage; PO:0007101 LP.09 nine leaves visible.	Eighth Leaf (V9). PO:0006340 adult leaf; PO:0009025 vascular leaf; PO:0001053 3 leaf fully expanded; PO:0007116 LP.11 eleven leaves visible.	Eleventh Leaf (V9). PO:0006340 adult leaf; PO:0009025 vascular leaf; PO:0001052 2 leaf expansion stage; PO:0007116 LP.11 eleven leaves visible.	Thirteenth Leaf (V9). PO:0006340 adult leaf; PO:0009025 vascular leaf; PO:0020040 leaf base; PO:0001052 2 leaf expansion stage; PO:0007116 LP.11 eleven leaves visible.	Immature Leaf (V9). PO:0006340 adult leaf; PO:0009025 vascular leaf; PO:0001052 2 leaf expansion stage; PO:0007116 LP.11 eleven leaves visible.	Thirteenth Leaf (VT). PO:0006340 adult leaf; PO:0009025 vascular leaf; PO:0020040 leaf base; PO:0001053 3 leaf fully expanded; PO:0007003 IL.03 full inflorescence length reached; PO:0007072 LP.18 eighteen leaves visible.	Immature Cob (V18). PO:0006505 central spike of ear; PO:0007006 IL.00 inflorescence just visible; PO:0007072 LP.18 eighteen leaves visible.	Pre-pollination Cob (R1). PO:0006505 central spike of ear; PO:0007016 4 flowering	Silks (R1). PO:0006354 ear floret; PO:0009074 style; PO:0007016 4 flowering.	Thirteenth Leaf (R2). PO:0006340 adult leaf; PO:0009025 vascular leaf; PO:0020040 leaf base; PO:0001053 3 leaf fully expanded; PO:0007001 FR.01 early stage of fruit ripening.	Innermost Husk (R1). PO:0009054 inflorescence bract; PO:0020136 Zea ear; PO:0007026 FL.00 first flower(s) open.	Innermost Husk (R2). PO:0009054 inflorescence bract; PO:0020136 Zea ear; PO:0007001 FR.01 early stage of fruit ripening.	Outer Husk (R2). PO:0009054 inflorescence bract; PO:0020136 Zea ear; PO:0007001 FR.01 early stage of fruit ripening.	Embryo 16DAP. PO:0009009 plant embryo; PO:0001095 true leaf formation; PO:0007001 FR.01 early stage of fruit ripening.	Embryo 18DAP. PO:0009009 plant embryo; PO:0001095 true leaf formation; PO:0007031 FR.02 mid stage of fruit ripening.	Embryo 20DAP. PO:0009009 plant embryo; PO:0001095 true leaf formation; PO:0007031 FR.02 mid stage of fruit ripening.	Embryo 22DAP. PO:0009009 plant embryo; PO:0001095 true leaf formation; PO:0007031 FR.02 mid stage of fruit ripening.	Embryo 24DAP. PO:0009009 plant embryo; PO:0001095 true leaf formation; PO:0007031 FR.02 mid stage of fruit ripening.	Endosperm 12DAP. PO:0009089 endosperm; PO:0007001 FR.01 early stage of fruit ripening; PO:0007633 endosperm development stages.	Endosperm 14DAP. PO:0009089 endosperm; PO:0007001 FR.01 early stage of fruit ripening; PO:0007633 endosperm development stages.	Endosperm 16DAP. PO:0009089 endosperm; PO:0007001 FR.01 early stage of fruit ripening; PO:0007633 endosperm development stages.	Endosperm 18DAP. PO:0009089 endosperm; PO:0007031 FR.02 mid stage of fruit ripening; PO:0007633 endosperm development stages.	Endosperm 20DAP. PO:0009089 endosperm; PO:0007031 FR.02 mid stage of fruit ripening; PO:0007633 endosperm development stages.	Endosperm 22DAP. PO:0009089 endosperm; PO:0007031 FR.02 mid stage of fruit ripening; PO:0007633 endosperm development stages.	Endosperm 24DAP. PO:0009089 endosperm; PO:0007031 FR.02 mid stage of fruit ripening; PO:0007633 endosperm development stages.	Seed 2DAP. PO:0009001 fruit; PO:0001180 B proembryo stage; PO:0007042 5 fruit formation.	Seed 4DAP. PO:0009001 fruit; PO:0001180 B proembryo stage; PO:0007042 5 fruit formation.
ZmLAX1	5.51	57.76	61.5	18.62	137.32	64.68	396.81	345.03	105.59	56.44	211.14	53.56	5.14	48.87	45.65	7.7	22.25	70.54	3.17	1.19	132.97	5.32	79.88	3.39	6.67	2.94	39.6	8	930.16	83.88	20.74	11.33	33.03	21.13	17.56	109.24	106.27	166.05	111.81	139.65	5.32	9.55	10.55	10.3	67.58	56.03	45.75	29.21	42.82
ZmLAX2	7.82	750.36	289.54	163.82	505	290.57	1136.5	538.69	343.86	174.08	1142.25	20.2	18.4	241.28	417.91	28.87	341.51	188.42	43.07	26.36	66.74	14.51	596.41	8.47	6.2	22.34	277.08	6.35	2188.28	933.9	49.41	40.98	107.94	31.53	31.03	438.42	106.48	270.53	1480.25	396.32	11.72	2.86	11.49	22.2	33.49	45.61	18.99	221.29	210.66
ZmLAX3	48.68	553.39	196.1	328.01	82.77	343.9	242.79	437.77	1960.53	330.32	279.44	749.2	485.72	703.83	990.72	672.5	1038.46	428.62	464.19	323.19	657.32	350.57	411.91	247.11	1971.77	1851.8	2649.18	676.91	974.45	1411.05	3594.94	685.24	2077.17	1545.98	1296.68	57.93	87.83	85.17	268.44	65.12	90.04	91.75	352.36	172.13	204.53	295.08	368.29	1698.24	427.61
ZmLAX4	6.65	1859.64	579.1	370.44	574.8	87.36	87.53	117.46	244.63	75.13	292.62	284.73	20.2	686.7	563.58	167.67	1257.57	578.32	60.77	25.93	446.14	40.69	455.23	32.4	15.03	188.86	422.31	19.51	371.02	189.61	2296.69	8.96	276.74	59.05	37.01	26.96	51.5	71.87	56.29	63.53	18.61	13.97	1.36	16.41	31.3	17.21	7.81	192.73	189.13
ZmLAX5	28.44	57.45	89.56	49.31	61.04	130.04	218.12	612.11	557.79	57.55	62.35	147.3	41.88	26.19	26.52	52.64	19.05	66.19	38.67	17.06	27.18	46.53	16.95	77.11	164.11	89.76	91.99	114.13	135.6	214.87	177.3	35.96	91.74	89.34	75.55	38.95	10.88	31.73	43.46	23.18	64.64	135.09	54.3	264.8	275.27	223.16	113.61	231.97	112.23
ZmABCB1	2230.64	1132.4	512.74	161.8	149.22	473.7	1072.94	1242.34	462.69	404.67	1171.7	739.56	2343.39	1968.02	938.42	600.4	1351.71	1633.26	365.53	97.09	416.35	312.89	1342.21	671.49	1948.48	1583.78	2645.86	1766.56	923.21	742.15	2319.12	745.01	905.6	384.53	1257.69	4589.56	897.67	1896.83	2386.09	3235.48	916.94	2817.81	403.57	1124.28	885.43	2068.92	1199.28	1831.79	1996.93
ZmABCB2
ZmABCB3	35.25	144.43	110.94	101.12	198.91	108.01	161.23	191.59	24.51	162.15	232.35	139.42	125.11	98.2	211.37	282.2	72.75	240.85	141.2	281.6	27.52	307.3	113.11	122.34	161.46	61.28	86.85	269.08	202.22	86.69	422.65	514.74	89.45	21.52	355.63	279.99	73.79	147.69	160.98	305.87	546.74	576.42	242.23	236.97	306.1	328.71	142.73	90.25	263.13
ZmABCB4	10.93	131.55	28.4	29.69	49.76	105.16	130.55	193.91	58.77	63.74	53.22	30.79	99.94	126.97	14.11	23.63	40.7	45.46	51.69	14	61.25	45.52	219.02	52.59	35.69	44.59	147.11	48.88	79.6	166.22	1122.95	46.12	212.44	57.51	186.36	37.75	18.44	8.51	34.78	26.33	2.78	8.04	6.65	12.74	15.47	12.3	10.07	110.47	87.78
ZmABCB5	898.19	1490.88	1221.59	618.05	1668.96	1226.83	494.63	185.98	161.36	595.49	1729.93	528.75	1835.94	930.42	131.43	658.9	838.26	898.37	1430.07	1088.06	322.22	1300.2	881.44	458.36	235.17	246.3	1150.41	1383.6	515.6	1153.64	1228.96	1947.35	1116.17	600.58	709.36	481.64	316.17	803.46	290.43	718.36	679.85	460.95	912.34	110.06	480.47	333.51	725.92	600.54	387.71
ZmABCB6	23.09	94.47	42.89	66.14	47.98	26.63	100.94	154.74	55.08	121.09	70.02	8.15	7.15	23.49	42.61	8.64	48.94	39.62	24.92	15.09	36.92	8.28	110	6.56	22.76	40.65	31.13	17.6	15.91	24.12	73.11	3.39	39.52	19.54	14.71	109.12	21.89	40.8	133.61	115.2	23.83	32.31	26.14	17.51	11.93	64.09	29.29	45.28	42.73
ZmABCB7	744.11	359.99	2566.28	449.94	513.85	346.64	478.15	1399.63	421.74	21.13	65.2	154.73	1730.68	1868.9	2020.6	2615.62	391.78	1748.5	2206.53	512.53	167.97	607.29	165.75	1164.59	331.08	76.22	73.84	1278.52	34.2	67.74	22.41	511.88	338.58	413.43	224.93	84.95	17.53	71.58	37.84	186.43	94.11	115.21	356.83	85.64	323.39	293.38	348.52	78.84	152.92
ZmABCB8	84.09	191.47	169.01	23.25	69.23	134.97	292.17	326.21	293.16	271.14	193.93	210.18	137.26	366.8	104.73	520.69	69.9	716.04	552	1428.37	177.26	465.76	544.82	342.27	445.05	209.17	465.53	113.43	536.23	673.56	302.46	377.06	34.99	72.16	767.21	314.1	288.85	222.71	434.75	943.43	33.69	324.44	282.49	43.29	370.46	376.44	181.46	132.94	299.47
ZmABCB9
ZmABCB10	1.6	1.38	1.85	3.61	4.67	4.2	6.31	14.44	4.13	12.79	2.52	1.48	10.13	2.14	1.3	4.98	0.93	2.93	7.27	12.35	8.6	16.52	4.84	1.39	2.01	4.27	4.72	15.71	3.72	7.44	5.53	18.96	3.46	1.37	8.75	8.03	7.21	4.61	9.95	4.2	30.3	21.19	11.6	12.11	49.25	13.43	7.44	2.41	3.03
ZmABCB11	351.83	155.01	472.1	77.76	337.27	381.95	301.36	195.82	193.32	120.77	255.03	60.83	254.52	248.08	179.88	237.26	335.03	377.18	75.6	259.67	352.83	167.48	93.67	95.1	170.85	166.76	553.03	232.47	328.06	568.65	303.43	290.47	462.66	228.04	439.25	141.6	174.3	91.23	149.72	40.23	252.39	214.18	35.53	103	217.87	352.9	149.13	122.81	127.32
ZmABCB12
ZmABCB13
ZmABCB14	7.71	6.36	14.06	7.14	8.09	8.46	12.3	31.11	50.35	8.73	26.33	40.72	31.13	7.42	51.57	3.2	22.65	21.18	16.59	36.55	10.6	36.12	26.92	15.41	10.85	6.17	24.15	32.82	168.08	52.09	11.25	47.63	16.22	16	26.45	9.18	12.64	8.3	26.91	2.12	65.33	21.95	20.01	35.56	22.86	24.6	4.18	30.32	13.56
ZmABCB15	26.95	9.73	2.53	6.43	40.23	25.24	62.27	48.57	12.84	34.22	32.98	19.56	12.26	1.36	0.72	1.9	4.73	6.2	9.59	3.61	6.35	8.3	18.11	7.48	7.77	11.62	4.62	2	97.06	34.29	26.08	5.68	38.81	28.54	18.83	18.43	12.41	52.74	78.51	41.18	6.1	7.62	4.98	2.92	8.34	15.22	8.69	57.69	38.38
ZmABCB16	0.51	52.46	0.8	53.85	15.47	20.49	27.14	26.78	10.89	0.99	74.02	61.72	51.52	70.18	3.56	10.95	3.41	136.49	7.37	8.68	223.98	9.22	72.3	6.46	31.52	34.15	92.49	8.79	8.87	34.08	243.1	15.68	256.19	10.8	15.47	3.43	10.67	5.75	15.52	15.6	22.91	34.81	28.57	22.45	9.14	11.36	10.41	150.02	237.39
ZmABCB17
ZmABCB18	163.79	527.86	696.86	182.17	90.08	309.67	606.41	75.75	279.57	404.06	637.6	264.95	1366.37	233.04	495.89	1548.98	1248.7	1177.46	713.82	368.71	1238.37	1710.68	296.36	1212.56	1092.17	224.86	1398.03	325.14	733.73	628.08	1229.54	2085.68	1105.14	118.08	376.57	715.56	104.31	206.44	46.04	432.53	229.13	218.67	131.14	219.73	214.23	136	286.59	1008.62	972.31
ZmABCB19	2.86	7.85	2.9	6.5	4.73	4.01	5.74	4.29	3.42	17.29	14.93	1221.42	375.15	3.72	5.98	6.22	6.39	4.78	15.77	18.06	5.93	10.32	6.76	11.45	4.31	5.46	1.46	16.87	16.4	13.57	19.21	46.66	6.77	7.12	9.75	5.49	13.33	8.26	19.63	3.06	4.54	12.34	16.54	23.18	38.01	28.56	5.98	7.44	13.25
ZmABCB20	509.57	237.86	136.79	701.76	647.6	701.86	426.21	157.83	465.45	744.45	774.54	484.41	798.16	295.85	687.55	299.96	467.26	273.6	301.1	591.06	337.04	298.56	607.39	346	197.35	333.04	317.08	305.15	891.96	536.76	403.32	70.61	193.88	82.31	719.43	781.87	294.06	332.77	342.09	470.8	1044.79	1175.59	769.37	839.8	1516.14	2560.04	474.6	778.2	1593.56
ZmABCB21	244.93	826.56	429.42	875.13	1656.28	425.27	2434.44	2770.82	842.73	237.94	700.4	668.01	2333.72	1579.1	1240.75	6331	714.43	3346.35	2734.32	1752.01	1434.69	2373.1	787.1	3692.27	2703.59	1340.86	3544.19	2496.92	1410.76	720.01	604.75	9256.09	809.25	1538.87	1785.04	457.61	342.52	1313.32	1108.66	1156.55	283	45.05	79.67	148.88	201.17	137.34	39.97	2057.92	1542.01
ZmABCB22	6.95	29.04	6.76	6.98	40.72	34.81	50.13	30.41	108.44	38.68	59.32	8.15	43.39	9.4	9.17	15.42	22.18	15.09	4.16	95.01	8.35	5.29	31.84	23.45	1.03	6.12	26.29	21.16	281.42	20.38	11.93	62.72	11.28	0.82	25.87	28.25	15.2	7.77	7.09	12.86	63.93	48.22	110.4	54.46	12.93	142.3	50.22	36.02	25.59
ZmABCB23	6.95	29.04	6.76	6.98	40.72	34.81	50.13	30.41	108.44	38.68	59.32	8.15	43.39	9.4	9.17	15.42	22.18	15.09	4.16	95.01	8.35	5.29	31.84	23.45	1.03	6.12	26.29	21.16	281.42	20.38	11.93	62.72	11.28	0.82	25.87	28.25	15.2	7.77	7.09	12.86	63.93	48.22	110.4	54.46	12.93	142.3	50.22	36.02	25.59
ZmABCB24
ZmABCB25	30.09	254.81	5.28	60.32	133.6	84.16	195.87	57.44	39.09	11.67	15.19	40.83	166.61	123.75	31.11	790.53	64.6	262.38	769.35	172.46	3.71	213.55	8.04	120.75	206.19	69	87.2	384.69	18.18	24.63	35.97	954.62	366.86	341.28	2247.31	21.52	5.01	10.51	4.92	6.11	11.26	11	25.61	6.64	60.29	64.07	41.56	10.58	23.46
ZmABCB26	606.71	726.27	820.48	362.04	735.01	790.41	1278.68	1441.62	462.1	63.74	439.35	338.18	1831.72	923.74	248.28	1500.46	688.29	833.32	1842.74	1149.1	1645.84	1528.95	520.02	290.14	427.94	155.03	1332.54	876.16	599.9	254.25	1128.4	2454.32	691.31	892.06	1141.06	268.74	156.24	1010.64	105.12	763.66	202.53	225.13	176.23	252.38	71.92	89.93	86	43.05	996.22
ZmABCB27	778.67	1056.96	1066.51	228.91	290.38	813.22	398.67	144.28	121.82	184.22	549.05	36.83	654.27	1691.46	1203.63	1147.17	1058.17	722.26	1553.02	668.59	355.85	114.96	368.51	194.48	335.33	497.15	163.93	477.48	168.25	291.86	156.21	365.22	477.16	355.51	281.48	267.87	88.66	72.56	265.18	285.26	61.83	33.77	28.73	32.66	159.11	77.17	11.53	207.43	195.63
ZmABCB28	778.67	1056.96	1066.51	228.91	290.38	813.22	398.67	144.28	121.82	184.22	549.05	36.83	654.27	1691.46	1203.63	1147.17	1058.17	722.26	1553.02	668.59	355.85	114.96	368.51	194.48	335.33	497.15	163.93	477.48	168.25	291.86	156.21	365.22	477.16	355.51	281.48	267.87	88.66	72.56	265.18	285.26	61.83	33.77	28.73	32.66	159.11	77.17	11.53	207.43	195.63
ZmABCB29	554.48	1545.67	410.53	862.49	821.3	1166.22	2290.65	1116	1178.4	708.26	877.27	1609.73	1266.6	1453.97	549.4	676.44	185.5	1077.71	956.86	313.55	2221.43	327.46	973.6	700.64	257.44	492.79	2014.78	2104.07	2322.07	3309.16	2558.09	1247.13	2959.37	200.61	993.89	654.85	749.02	1828.46	661.87	946.36	1243.49	873.31	1443	681.49	348.91	1044.07	1941.11	1126.43	2954.61
ZmABCB30	6.33	56.52	109.3	50.7	237.1	98.56	132.48	116.2	267.45	0.77	39.16	17.37	61.88	85.33	57.18	140.37	12.14	66.67	473.4	102.82	1.54	8.86	6.47	198.29	135.32	103.43	24.6	551.31	92.91	125.28	312.47	433.72	489.29	63.14	321.66	23.41	2.12	23.2	40.67	9.22	16.6	10.66	6.71	1.79	3.61	4.22	10.36	192.58	153.87
ZmABCB31	8.14	5.55	32.02	6.56	19.02	25.68	28.59	53.97	7.52	28.31	92.96	531.86	13.58	14.62	23.11	9.28	13.24	17.9	682.65	53.23	3.77	4.29	10.95	39.39	11.09	30.27	9.25	60.54	115.37	17.25	3.99	88.47	13.06	5.56	15.28	77.83	18.95	7.84	18.49	46.1	14.14	72.09	74.56	37.43	65.54	54.51	16.3	55.44	8.4
ZmABCB32	3.53	5.71	12.47	4.93	8.88	7.05	6.64	14.04	7.07	11.85	3.84	5.56	19.93	10.22	92.3	16.89	19.03	17.93	25	20.64	1.95	14.01	7.36	21.24	6.56	19.78	33.95	10.83	35.12	16.43	20.12	59.77	31.12	90.75	17.81	70.41	24.89	34.92	63.49	24.04	36.1	47.67	90.16	26.41	158.7	13.54	5.63	16.49	38.06
ZmABCB33	703.52	297.23	2806.69	1151.88	892.76	677.39	539.82	1298.11	376.57	28.23	52.57	602.06	806.53	1502.31	7151.9	4648.11	2970.1	1299.13	1275.16	1980.88	293.46	1139.38	223.28	1318.62	319.28	50.14	127.55	911.81	45.6	82.7	269.6	1452.55	329.15	384.29	354.51	38.02	62.2	75.44	128.36	158.45	48.4	194.98	283.54	81.1	322.55	342.03	330.05	83.41	93.07
ZmABCB34	50.37	986.5	532.92	906.1	942.89	180.6	841.12	1501.4	1120.7	1821.89	1616.43	329.51	102.78	179.71	593.38	119.73	1244.62	511.61	174.42	181.07	257.45	5.9	1521.1	96.69	755.83	132.54	489.72	112.32	2724.46	817.84	319	387.98	1574.2	580.47	81.63	48.62	94.15	190.45	616.8	773.93	160.38	267.96	401.26	45.96	145.52	274.96	318.65	1007.76	597.65
ZmABCB35
ZmPIN5b	4.86	1.58	0.57	1.11	3.35	5.41	3.26	14.91	7.33	3.5	9	1.8	10.99	5.3	3.9	2.47	2.65	6.27	7.7	5.31	2.16	1.69	14.75	11.41	6.48	5.22	4.99	15.42	3.95	3.22	7.21	11.43	2.71	5.26	6.49	2.82	1.87	0.27	7.92	4.15	4.03	5.05	45.46	13	10.52	2.15	3.47	5.41	2.07
ZmPIN5c	2.33	2.91	1.71	9.28	9.64	27.14	14.31	34.17	24.49	2.33	1.19	28.7	23.78	4.97	8.13	21.2	0.38	7.48	12.75	9.64	3.4	13.93	20.04	12.11	8.4	12.69	7.73	35.75	13.21	21.39	23.15	10.25	8.11	4.87	14.61	20.4	19.35	13.66	2.47	26.73	15.8	13.09	44.65	52.78	34.35	7.23	11.25	40.4	39.28
ZmPIN13
ZmPIN14
ZmPIN5a	19.04	19.15	19.59	11.15	40.63	6.9	10.07	23.21	18.77	15.42	8.38	20.15	13.42	30.31	11.59	130.7	16.85	73.56	128.22	134.75	23.98	125.44	24.59	38.18	16.67	7.22	10.26	50.24	9.11	18.01	4.36	139.82	25.98	14.56	26.88	8.97	13.97	37.32	17.11	15.85	15.2	38.17	25.67	3.09	83.52	40.25	3.67	4.79	5.12
ZmPIN9	99.79	3.36	4.98	6.8	14.87	42.33	2.19	10.97	9.54	0.8	3.87	1.58	7.02	1.93	11.61	9.85	18.57	8.73	14.05	2.52	5.3	4.32	2.22	3.8	37.75	25.5	3.89	4.34	4.08	2.54	1.46	4.67	2.18	5.5	3.19	3.34	3.21	3.87	1.59	2.86	6.57	1.5	6.9	5.85	4.15	5.63	0.68	2.95	4.38
ZmPIN8	93.41	113.33	131.47	173.91	265.87	450.43	483.4	1036.65	600.56	185.54	330.81	126.79	37.32	85.18	125.8	10.99	21.14	10.06	14.41	11.28	7.79	14.68	54.61	0.98	4.61	5.43	13.61	15.26	452.78	280.31	35.27	18.81	15.55	23.7	18.16	20.13	80.11	42.38	6.58	155.59	283.3	56.41	17.59	38.51	10.14	74.21	29.32	393.27	360.5
ZmPIN10a	61.46	182.38	16.54	12.3	82.96	19.79	61.37	100.04	130.16	46.37	139.21	193	74.25	57.56	38.36	28.68	9.26	133.35	62.81	24.63	308.03	1.55	226.85	56.29	202.26	71.34	553	19.75	55.37	412.06	1412.6	69.4	133.69	86.5	40.27	248.4	224.37	580.19	80.6	352.13	41.75	15.02	26.3	6.49	30.69	26.56	11.34	151.36	220.09
ZmPIN1c
ZmPIN1d	7.07	26.65	57.09	34.88	49.34	16.32	135.75	68.72	38.51	46.16	140.35	7.76	7.49	48.36	17.54	15.39	30.15	28.12	14.12	10.13	1.34	18.65	4.95	10.45	3.17	12.43	31.6	22.58	414.1	101.71	18.71	49.04	13.74	4.24	14.46	165.69	125.82	30.83	172.48	53.14	29.22	8.72	10.27	8.07	9.24	35.9	7.08	29.02	34.96
ZmPIN5d	27.21	37.88	47.73	6	55.12	12.21	13.5	28.13	25.31	23.03	10.73	39.92	14.21	42.81	22.36	149.94	29.92	75.62	40.95	40.73	37.29	231.95	40.7	32.66	25.66	10.1	6.79	61.47	24.96	23.2	21.22	191.17	39.11	18.14	34.13	27.98	8.69	52.76	17.97	14.21	34.49	46.84	35.8	6.89	167.71	47.71	7.67	8.14	2.26
ZmPIN15
ZmPIN1b	48.83	552.68	112.09	173.52	345.38	91.29	549.31	510.95	303.11	204.12	274.56	48.07	123.73	730.37	203.08	184.75	532.42	196.36	532.61	90.06	776.91	151.04	163.95	703.98	248.07	515.84	1514.99	556.27	373.51	190.58	3891.93	528.1	560.51	135.99	254.28	209.06	60.9	135.86	178.9	333.52	38.22	52.66	33.54	34.67	46.44	65.29	10.61	343.42	242.06
ZmPIN1a	16.41	312.31	31.22	163.12	201.42	196.5	428.6	232.57	364.35	44.74	302.78	62.62	64.11	116.1	109.38	111.86	400.02	81.6	137.13	12.2	389.07	18.58	94.06	222.95	117.83	45.39	165.8	480.99	616.09	168	245.26	180.65	219.72	63.56	88.37	77.77	145.12	75.11	84.55	202.54	35.21	6.73	9.79	12.01	40.83	17.34	5.4	204.2	186.41
ZmPIN10b	4.29	3.18	2.68	6.65	10.36	3.44	15.47	16.24	6.53	9.96	11.73	13.14	36.71	2.69	1.97	17.32	5.62	5.88	1.6	31.41	17.06	15.13	7.8	1.85	11.82	10.92	10.91	57.94	5.07	19.69	70.53	36.92	11.74	2.45	8.26	20.05	7.15	8.88	7.89	4.48	3.59	10.5	21.02	9.72	23.56	11.9	7.71	5.38	3.46
ZmPILS1	14.34	1.04	5	16.48	10.75	7.77	16.05	27.11	27.06	54.25	1.63	10	39.4	27.54	3.04	88.71	18.1	9.95	10.14	41.08	26.66	108.75	15.36	42.97	47.24	8.34	20.28	169.45	28.77	14.14	48.94	64.1	46.6	6.65	13.74	5.37	12.92	5.33	1.01	17.86	3.15	0.2	31.05	3.73	2.06	2.23	10.45	24.68	31.91
ZmPILS2	87.66	18.32	16	7.86	6.75	55.64	14.82	44.54	30.11	106.49	31.99	28.88	53.1	73.44	7.32	751.68	26.63	375.82	300.97	624.1	23.1	1040.47	35.17	218.81	124.24	23.27	74.81	1695.82	62.86	31.32	20.47	743.17	6.79	22.65	21.68	55.94	45.29	49.47	69.07	69.81	34.71	11.53	84.62	18.78	40.79	8.49	20.65	34.95	22.53
ZmPILS3	40.32	23.01	10.2	16.76	14.47	27.27	28.84	31.72	7.64	19.3	29.62	7.39	35.72	37.8	23.26	356.07	10.28	63.82	479.5	164.55	9.7	495.52	3.92	187.67	40.87	8.89	10.07	615.76	39.39	8.65	41.9	165.5	19.77	15.74	36.52	47.85	45.56	17.54	19.27	7.09	2.06	9.06	26.3	0.23	15.41	12.83	30.58	11.56	2.07
ZmPILS4	586.77	1640.32	61.22	1068.79	682.29	1635.74	784.32	1524.86	2087.8	402.59	538.55	478.73	710.19	38.54	1438.79	305.09	959.83	442.85	1087.64	254.37	2895.7	623.26	564.47	603.83	859.55	1816.95	2331.39	2354.33	1482.6	1799.49	3251.41	776.35	1895.07	764.04	1623.38	305.12	143.98	199.18	927.63	1014.05	726.69	106.27	822.14	391.66	485.16	985.92	697.12	133.35	1764.16
ZmPILS5	61.17	1169.51	222.2	252.65	361.16	369.57	344.22	560.03	557.12	380.54	156.77	423.92	451.63	339.01	528.28	403.16	250.98	221.71	456.64	132.88	373.25	328.43	288.98	48.08	689.03	410.09	464.67	118.47	467.18	153.8	310.79	656.31	700.76	290.35	1346.4	197.55	283.53	408.62	217.73	206.62	597.92	462.9	180.99	166.47	712.41	741.7	481.92	1525.81	369.13
ZmPILS6	17.55	2.97	19.08	19.33	4.44	13.55	6.68	54.53	27.77	8.96	6.75	28.24	59.03	28.84	4.2	121.57	36.91	148.54	100.47	387.74	9.03	1094.08	26.73	60.09	33.31	38.81	38.06	1427.19	39.22	28.63	47.3	587.41	18.46	6.07	15.88	40.27	14.46	22.71	13.7	36.15	22.98	36.37	13.25	21.51	14.82	30.85	30.89	32.98	60.14
ZmPILS7	251.27	74.62	344.45	37.76	71.93	45.78	11.07	13.43	5.17	7.71	114.45	27.88	108.65	47.81	214.62	13.05	173.17	24.01	622.96	38.62	5.02	9.78	4.98	44.83	5.16	12.11	3.32	182.72	13.29	35.22	23.75	110.36	27.69	156.64	409.2	7.55	4.84	12.53	25.52	22.31	13.67	13.11	250.86	7.68	138.86	217.5	63.48	106.31	35.26
ZmPILS8	258.16	51.9	64.2	48.19	51.87	90.65	122.67	163.18	52.21	50.79	108.63	50.06	161.08	86.2	34.02	1222.41	35.08	474.47	919.33	1930.4	101.38	700.74	20.87	1192.66	131.98	51.04	29.97	524.66	89.13	103.06	43.42	432.32	49.48	35.38	191.34	64.26	57.95	75.91	101.99	55.22	56.86	56.97	133.97	26.77	48.19	39.33	94.65	52.85	26.9
ZmPILS9	251.27	74.62	344.45	37.76	71.93	45.78	11.07	13.43	5.17	7.71	114.45	27.88	108.65	47.81	214.62	13.05	173.17	24.01	622.96	38.62	5.02	9.78	4.98	44.83	5.16	12.11	3.32	182.72	13.29	35.22	23.75	110.36	27.69	156.64	409.2	7.55	4.84	12.53	25.52	22.31	13.67	13.11	250.86	7.68	138.86	217.5	63.48	106.31	35.26
[truncated: 11 more columns]
